# Supplementary material for: Modelling take-off moment arms in an ornithocheiraean pterosaur
Source: PeerJ. 2024 Aug 5;12:e17678. doi: 10.7717/peerj.17678 (PMC11308997; doi:10.7717/peerj.17678)
Supplement: Supplemental Information 5 [file peerj-12-17678-s005.xlsx]

## Sheet: Origins
Muscle	Code	Modeled	Primary Function	Corroborating Literature (including EPB)	Origin	Correlate (concerning SMNK PAL 1133)	Inference level	Insertion	Correlate (concerning SMNK PAL 1133)	Inference Level	Notes
Pectoral group
trapezius	TRAP	No		Bennett 2003 (inference based on Dilkes 2000)	Posterior cervical neural spines/anterior dorsal neural spines	inferred	II'	Anterior scapula margin	inferred	II
sternocleidomastoideus	SCM	Yes	Adduction	Bennett 2003 (inference based on Dilkes 2000)	Anterior sternum	rugosity anterior cristospine	I	squamosal	inferred (element missing)	I'
levator scapulae	LS	No		Bennett 2003 (inference based on Dilkes 2000)	transverse process cervical vert 1-4	slight rugosity	II	anterior border scapula	inferred	II'
serratus superficialis	SS	No		Bennett 2003 (inference based on Dilkes 2000)	ventral last cervical rib + anterior dorsal ribs (up to 3)	inferred (element not examined)	I'	posteromedial scapula	inferred	I (divisions II)
serratus profundus	SP	No		Bennett 2003 (inference based on Dilkes 2000)	anterior cervical verts + inferior first 3 dorsal ribs	inferred (element not examined)	I'	with SS	inferred	I'
rhomboideus	RHOM	No		Bennett 2003 (inference based on Dilkes 2000)	8/9th vert	inferred	I'	medial superior scapula	inferred	I'
sternocoracoideus	SC	Yes	Adduction	Bennett 2003 (inference based on Dilkes 2000), Molnar 2009	anterior margin of sternum	inferred	II'	coracoid	posterior surface scar and flange	II
costosternocoracoideus	CSC	No		Bennett 2003 (inference based on Dilkes 2000)	posterior last cervical rib and first sternal	inferred (element not examined)		posterior margin coracoid	inferred likely entire posterior border	II
latissimus dorsi	LD	Yes	Abduction	Bennett 2003 (inference based on Dilkes 2000), Tokita 2015	last cervical neural spine to anterior dorsal verts	none but notarium fits	I'	proximal part of posterior humerus	prominent scar dorsal surface	I
teres major	TM	Yes	Abduction	Bennett 2003 (inference based on Dilkes 2000), Molnar 2009,Tokita 2015	posterolateral scapula	prominent posterior process	II	proximal part of posterior humerus	scar proximal and medial to LD	II
deltoides scapularis	DS	Yes	Abduction	Bennett 2003 (inference based on Dilkes 2000), Molnar 2009,Tokita 2015	lateral scapula/acromicon process	muscle scar dorsal scapula	I	dorsal (anterior) deltopectoral crest	inferred	I'
deltoides clavicularis	DC	No		Bennett 2003 (inference based on Dilkes 2000)	inferior anterior scapula near glenoid or on sternum or fused with SHA	? But would be inferred	I' (divisions II')	deltopectoral crest?	? But would be inferred	I' (divisions II')
scapulohumeralis anterior	SHA	Yes	Extension	Bennett 2003 (inference based on Dilkes 2000), Molnar 2009,Tokita 2015	scapula anterior to glenoid	large scar anterior to glenoid	II	dorsal (proximal) deltopectoral crest	inferred	II'
scapulohumeralis posterior	SHP	Yes	Flexion	Bennett 2003 (inference based on Dilkes 2000), Molnar 2009,Tokita 2015	posterior margin scapula above glenoid	pit posteroventral scapula	I	dorsal posterior process	scar dorsal and posterior surface of posterior tuberosity	I
subscapularis	SUBS	Yes	Flexion	Bennett 2003 (inference based on Dilkes 2000), Molnar 2009,Tokita 2015	medial ventral surface scapula	small oval scar undersurface scapula	I	dorsal posterior tuberosity	scar	I
subcoracoideus	SUBC	No		Bennett 2003 (inference based on Dilkes 2000)	medial coracoid	inferred but questionable	II'	dorsal posterior tuberosity	scar	II
triceps
triceps (medial head)	TR-M	Yes	Extension	Bennett 2003 (inference based on Dilkes 2000), Bennett 2008, Molnar 2009	medial - extensor side humeral shaft	groove and extensive weak scarring on medial shaft	I	olecron process ulna	process	I
triceps (scapular head)	TR-S	Yes	Extension	Bennett 2003 (inference based on Dilkes 2000), Bennett 2008, Molnar 2009	scapula -dorsal border of glenoid	curved scar above glenoid	I	olecron process ulna	process	I
triceps (coracoid head)	TR-C	Yes	Extension	Bennett 2003 (inference based on Dilkes 2000), Bennett 2008, Molnar 2009	coracoid - ventral posterior to glenoid	inferred	II'	olecron process ulna	process	II
triceps (lateral head)	TR-L	Yes	Extension	Bennett 2003 (inference based on Dilkes 2000), Bennett 2008, Molnar 2009	lateral - extensor side humeral shaft	broad weakly scarred area lateral surface	II	olecron process ulna	process	II
Pectoralis	PEC	Yes	Adduction	Bennett 2003 (inference based on Dilkes 2000), Molnar 2009,Tokita 2015	sternum ventral and lateral cristospine + plate	median rugosity	I	entire ventral deltopectoral crest	proximal heavy scarring	I
supracoracoideus	SUPC	Yes	Adduction	Bennett 2003 (inference based on Dilkes 2000), Molnar 2009,Tokita 2015	anterolateral surface of coracoid	long shallow groove	II	ventral surface proximal deltopectoral crest	inferred	II'
coracobrachialis	CB	Yes	Adduction	Bennett 2003 (inference based on Dilkes 2000), Molnar 2009,Tokita 2015	external suface of coracoid	coracoid tubercule as long rugose groove	I	proximal part flexor side humerus	broad muscle scar (bigger in pteranodon than anhanguera)	I (divisions II)
biceps	BI	Yes	Flexion	Bennett 2003 (inference based on Dilkes 2000), Bennett 2008, Molnar 2009	lateral surface of coracoid anterior to CB	biceps tubercule on coracoid	I	proximal radius/ulna	biceps tubercule on ulna, radius uncertain	I
Brachial group
brachialis	BR	Yes	Flexion	Bennett 2008	anterior humerus surface	inferred anterior shaft constrained by two rugose lines	I'	proximal radius/ulna	either biceps tubercule or lightly scarred area beside it on ulna, radius unknown	I
humeroradialis	HR	Yes	Flexion	Bennett 2008, Molnar 2009	proximal humerus	inferred anterior surface of humerus	II'	proximal radius	inferred	II'
triceps and biceps also in this group
Antebrachial group
flexor digitorum longus (quarti)	FDL	Yes	Flexion	Bennett 2008, Molnar 2009, Tokita 2015	medial epicondyle of humerus and Ulna	scarring	II	WMC and distal phalanges	inferred (element missing)	I'	note: Bennett splits wing FDL from rest and calls it flexor digiti quarti (FDQ) I have no metacarpals besides WMC so am just calling it FDL
flexor digitorum longus (quarti)	FDL-U	Yes	Flexion	Bennett 2008, Molnar 2010	medial ulna shaft Ulna	scarring	I	WMC and distal phalanges	inferred (element missing)	I'	note: Bennett splits wing FDL from rest and calls it flexor digiti quarti (FDQ) I have no metacarpals besides WMC so am just calling it FDL
extensor digitorum longus (quarti)	EDL	Yes	Extension	Bennett 2008, Molnar 2009, Tokita 2015	lateral epicondyle of humerus	scarring	I	extensor side WP1 possibly on additional phanlanges	inferred on posterior process	I'	note: as above but extensor this time
flexor carpi ulnaris	FCU	Yes	Flexion	Bennett 2008, Molnar 2009, Tokita 2015	medial epicondyle of humerus	scarring	I	WMC distal	inferred (element missing)	II'	note: passes over the preaxial carpal
flexor carpi radialis	FCR	Yes	Flexion	Bennett 2008, Molnar 2013	medial epicondyle of humerus	scarring	I	proximal syncarpal and possibly distal radius	potential small scar on syncarpal inferred for radius	II'
extensor carpi ulnaris	ECU	Yes	Extension	Bennett 2008, Molnar 2014	lateral epicondyle of humerus	scarring	I	posterior wmc large scar	scarring	II
extensor carpi radialis	ECR	Yes	Extension	Bennett 2008, Molnar 2015	lateral epicondyle of humerus	scarring	I	proximal syncarpal after moving around distal ulna ridge	inferred	II'
supinator	SUP	Yes	Supination (lar+)	Bennett 2008, Molnar 2016	ridge anterior to lateral epicondyle of humerus	prominent ridge and scars	I	posterior radius 3/4 shaft	scarring	I
pronator teres	PT	Yes	Pronation (lar-)	Bennett 2008	medial epicondyle of humerus more middle than FCU	slight ridge and scars	I	length of posterior radius	scarring	I
pronator quadratus	PQ	Yes	Pronation (lar-)	Bennett 2008	ulna shaft	ridge	I	posterior distal radius shaft	scarring	I
Carpus/Manus
extensor pteroideus		No
flexor digitorum brevis	FDB	Yes	Flexion	Bennett 2008, Molnar 2009	dorsal distal syncarpal	inferred	II'	medial face of extensor process wp1	scarring	I
extensor digitorum brevis	EDB	Yes	Extension	Bennett 2008, Molnar 2009	ventral distal syncarpal	inferred	II'	posterior WP1 process	scarring	II
lumbricales		No
adductor pollicis		No
interossei dorsales et palmares		No
Pelvic Group
adductor femoris (PIFM/PIFL in aves)	ADD	Yes	Adduction	Frigot 2018, Costa 2014, Fastnacht 2005, Bennett 2001	lateral surface of the ischium	slender scar	I	medial shaft (diaphysis) of the femur	scarring	I
illiofemoralis (IFE/ITC in aves)	IFM	Yes	Abduction	Frigot 2018, Costa 2014, Fastnacht 2005, Bennett 2001	Lateral margin of preacetabular process of the ilium	weak scarring	I	greater trochanter	scarring	I
puboischiofemoralis externus (ITM/ITCR in aves)	PIFE	Yes	Medial	Frigot 2018, Costa 2014, Fastnacht 2005, Bennett 2001	Lateral surface of the pubis	ridges marking anterior and dorsal extent	I	greater trochanter	scarring	I
pubosichiofemoralis internus (IFI in aves)	PIFI	Yes	Flexion	Frigot 2018, Costa 2014, Fastnacht 2005, Bennett 2001	medial surface of ilium anteriot to acetabulum	scarring	I	proximal surface of femur	scarring	I
ambiens	AMB	Yes	Extension	Frigot 2018, Costa 2014, Fastnacht 2005, Bennett 2001	pubic tubercule	tubercule and scarring	I	cnemial crest of tibia	inferred (element missing)	I'
iliotibialis (IC/IL in aves)	ITB	Yes	Extension	Frigot 2018, Costa 2014, Fastnacht 2005, Bennett 2001	Lateral margin of preacetabular process of the ilium	weak scarring	I	cnemial crest of tibia	inferred (element missing)	I'	may need more heads
flexor tibialis externus (FCLP in aves)	FTE	Yes	Flexion	Frigot 2018, Costa 2014, Fastnacht 2005, Bennett 2001	lateral surface of the postacetabular process of the ilium	slight groove (not as pronounced as fossa in Frigot)	II	medial surface of the tibia	inferred (element missing)	II'
flexor tibialis internus 1 (FCM in aves)	FTI1	Yes	Flexion	Frigot 2018, Costa 2014, Fastnacht 2005, Bennett 2001	lateral surface of ischial tuberosity	scarring	II	posteromedial shaft of tibia	inferred (element missing)	II'
flexor tibialis internus 2 FCM in aves)	FTI2	Yes	Flexion	Frigot 2018, Costa 2014, Fastnacht 2005, Bennett 2001	lateral surface of the postacetabular process of the ilium	exact location inferred but scarred on other specimens	II	posteromedial shaft of tibia	inferred (element missing)	II'
iliofibularis	ILF	Yes	Extension	Frigot 2018, Costa 2014	lateral surface of the postacetabular process of the ilium, dorsal to others	inferred	II'	posteromedial shaft of tibia	inferred (element missing)	II'
caudofemoralis brevis (CFC/CFP in aves)	CFB	Yes	Extension	Frigot 2018, Costa 2014, Fastnacht 2005, Bennett 2001	lateral iliac surface	inferred	I'	posterior (4th) trochanter of femur	scarring	I
femorotibialis externus (FMTL in aves)	FMTE	Yes	Extension	Costa 2014, Bennett 2001	proximal femoral shaft	scarring	I	cnemial crest of tibia	inferred (element missing)	I'
femorotibialis internus (FMTM/FMTIM in aves)	FMTI	Yes	Extension	Costa 2014, Bennett 2001	proximal femoral shaft	faint scarring	I	cnemial crest of tibia	inferred (element missing)	I'
